# Supplementary material
Source: HighWire-hosted journal article supplement (https://www.annfammed.org/highwire/filestream/17071/field_highwire_adjunct_files/0/Salama-Supp-Fig.pdf)

## Supplemental materials for

Mahoney D, Salama L. Enhancing patient-centered care through firsthand experience with continuous glucose monitoring in rural Wyoming. *Ann Fam Med*. 2024;22(1):69.

**Author contributions:** D.M. is a postgraduate year 3 (PGY-3) in family medicine. He is also one of the chief medical residents of the program; L.S. is a clinical assistant professor. She teaches pharmacy students and medical residents and has a clinical practice set up at the clinic.

**Acknowledgments:** We acknowledge the generous contribution of free CGM samples from DexcomA, Inc.

## Supplemental Figure. CGM benefits and lessons learned: walking in patients' shoes at UWFMR.

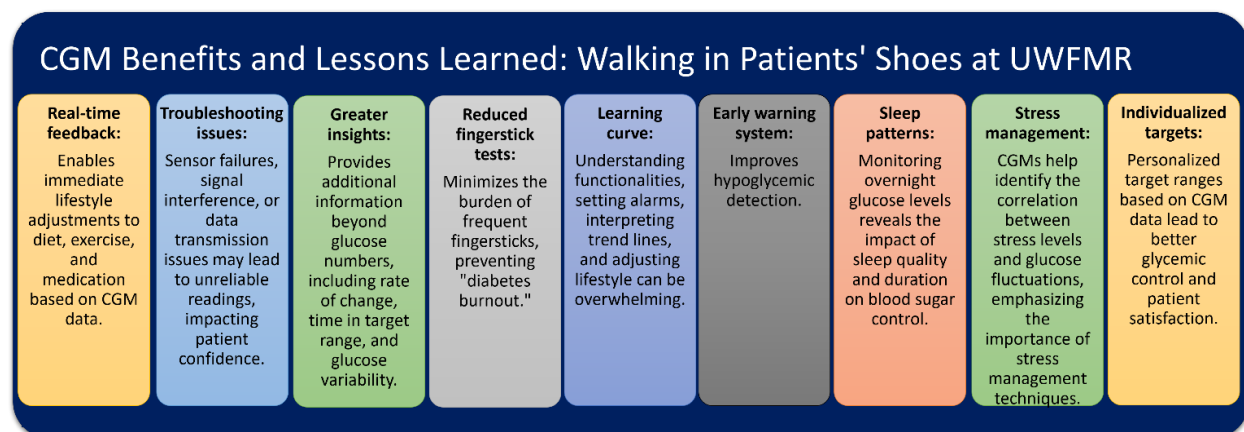

Supplement: Salama-Supp-Fig.pdf [file Salama-Supp-Fig.pdf]
